# Supplementary material for: Incorporation of superamphiphobic and slippery patterned materials for water collection inspired by beetle, cactus, and Nepenthes
Source: Royal Society of Chemistry journal article supplement (doi:10.1039/d2nj04299a), 2022-12-09
Supplement: d2nj04299a1.pdf [file d2nj04299a1.pdf]

**Incorporation of superamphiphobic and slippery patterned  
materials for water collection inspired from beetle, cactus, and  
*Nepenthes***

Chenyang Zhao<sup>1</sup>, Pan Li<sup>1</sup>, Zhao Li<sup>2</sup>, Shan Peng<sup>\*1</sup>

*1 Engineering Technology Research Center for Flame Retardant Materials and Processing Technology of Hebei Province, Key Laboratory of Analytical Science and Technology of Hebei Province, College of Chemistry and Environmental Science, Hebei University, Baoding 071002, Hebei, China.*

*2 College of Materials Science and Engineering, Xi'an University of Science and Technology, Shanxi, 710054, Xi'an, PR China*

Chenyang Zhao and Pan Li are co-first authors; they contributed equally to the work.

Corresponding author. E-mail: pengshan5213@163.com

Phone: (+86)15013038214

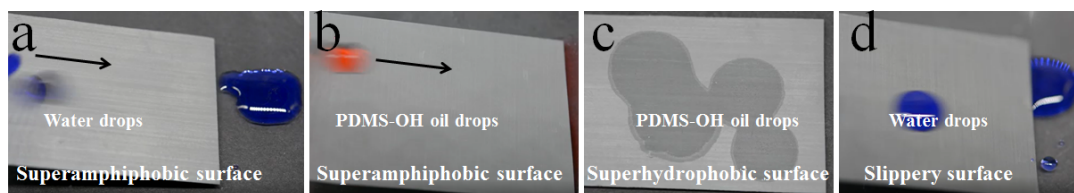

**Fig. S1.** (a, b) The superamphiphobic surface quickly repelled water and PDMS-OH drops. (c) PDMS-OH drops could fast immerse in superhydrophobic surface. (d) water drops quickly slid from the slippery surface.

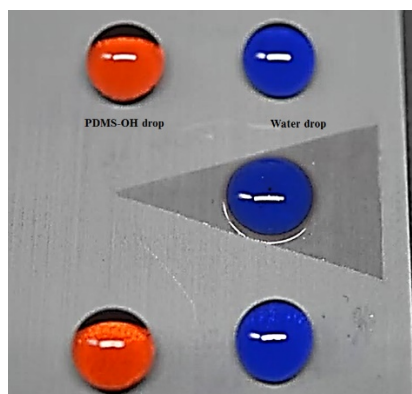

**Fig. S2.** Demonstration of hybrid superamphiphobic-slippery patterned surface. Water and PDMS-OH drops stood still on superamphiphobic surface, however, PDMS-OH drops spread on wedge-shaped superhydrophobic surface. Water was dyed in blue while PDMS-OH was dyed in red.

### Pure aluminum surface

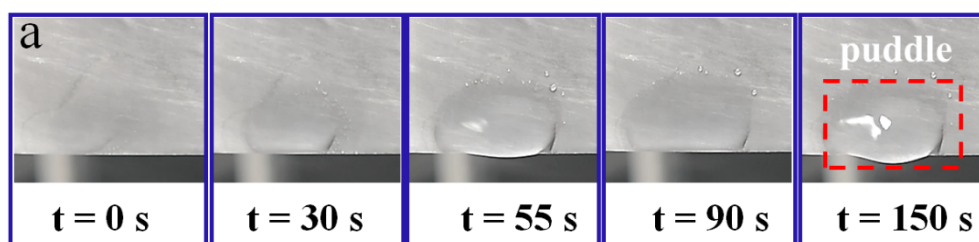

### Superhydrophilic aluminum surface

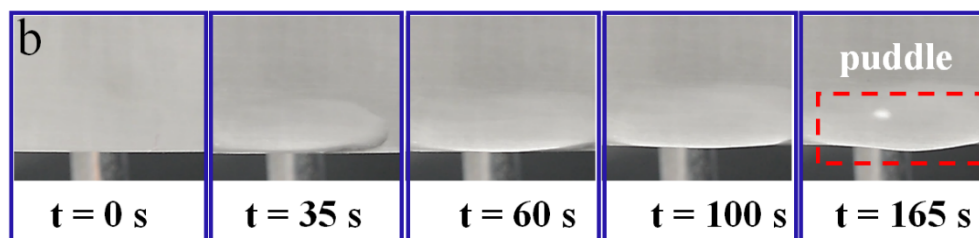

**Fig. S3.** Water collection processes using the pure aluminum surface (a) and superhydrophilic aluminum surface (b). Puddle phenomena (marked by the dotted-lined square) occurred in both conditions.

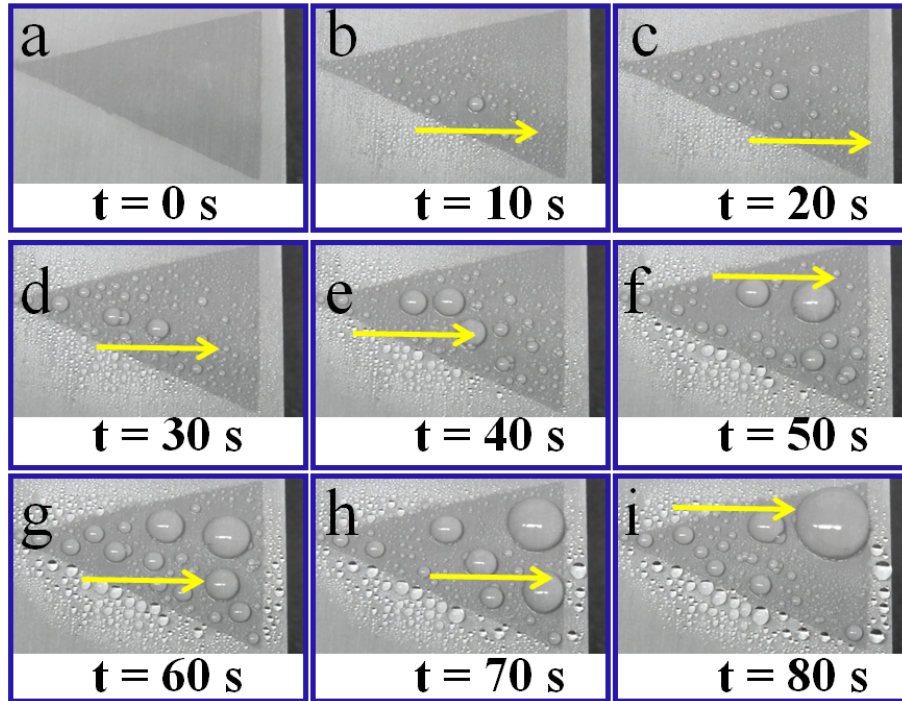

**Fig. S4.** Self-driven water transportation behavior of the wedge-shaped slippery surface.

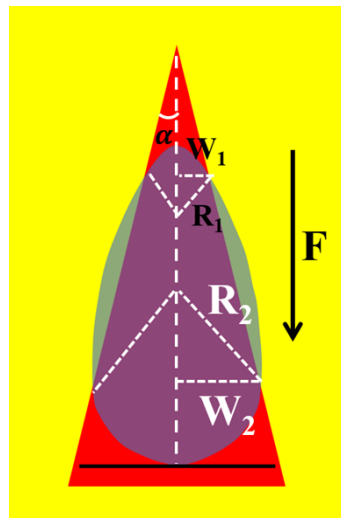

**Fig. S5.** The scheme of self-driven water transportation. The droplet length is approximate  $\frac{\sin \alpha}{w_2 - w_1}$ . The Laplace pressure on each side of the droplet is expressed as  $\gamma \left( \frac{1}{R_1} - \frac{1}{R_2} \right)$ . The pressure gradient along the microchannel is  $\gamma \left( \frac{1}{R_1} - \frac{1}{R_2} \right) \frac{\sin \alpha}{w_2 - w_1}$ . Since the droplet is wedge-shaped, water drop can be self-driven transported through Laplace pressure gradient.

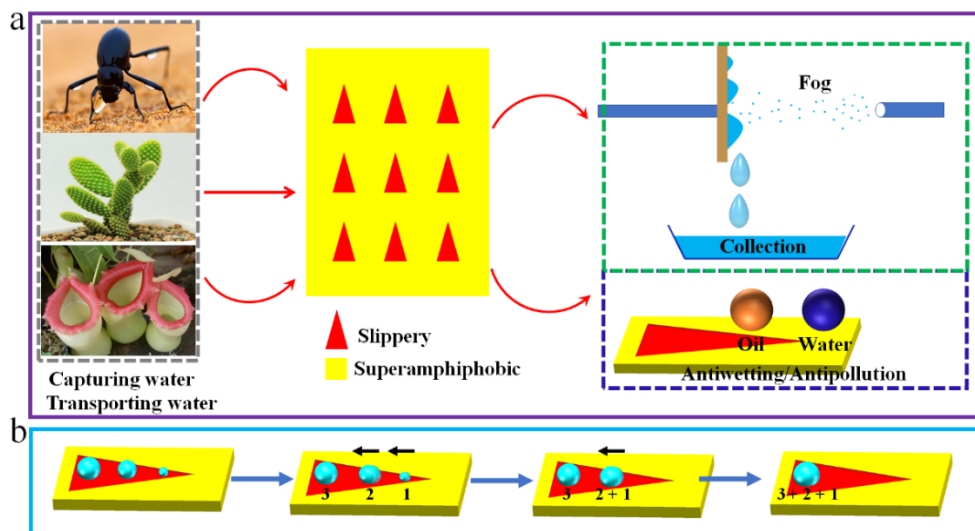

**Fig. S6.** The originally biological models for design of patterned surface.

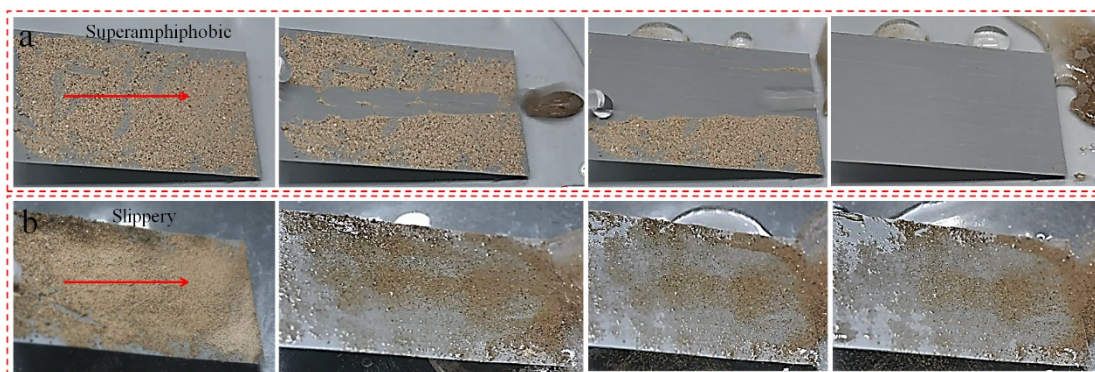

**Fig. S7.** Self-cleaning tests of superamphiphobic (a) and slippery (b) surfaces.

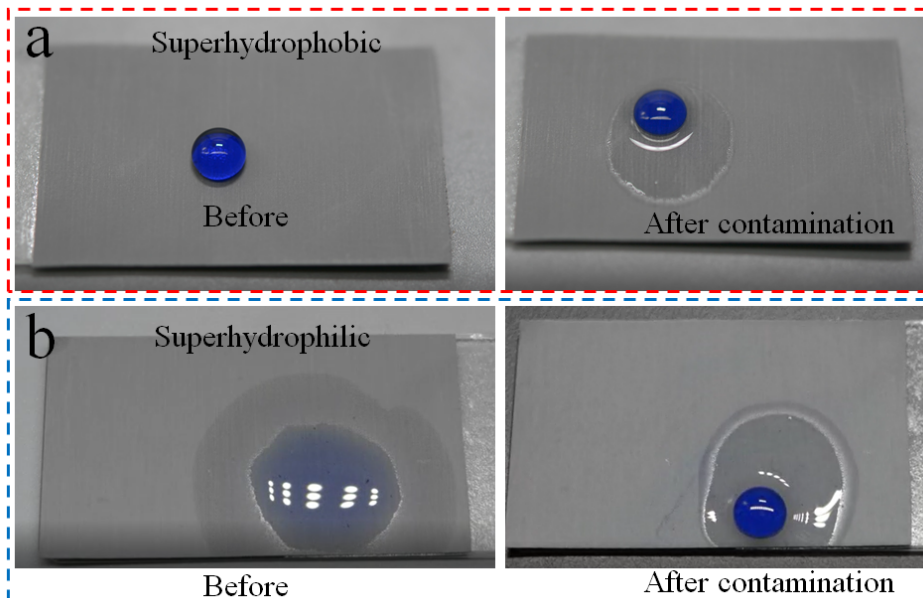

**Fig. S8.** Superhydrophobic (a) and superhydrophilic (b) surfaces immediately lose

superhydrophobicity and superhydrophilicity after contaminated by oil.

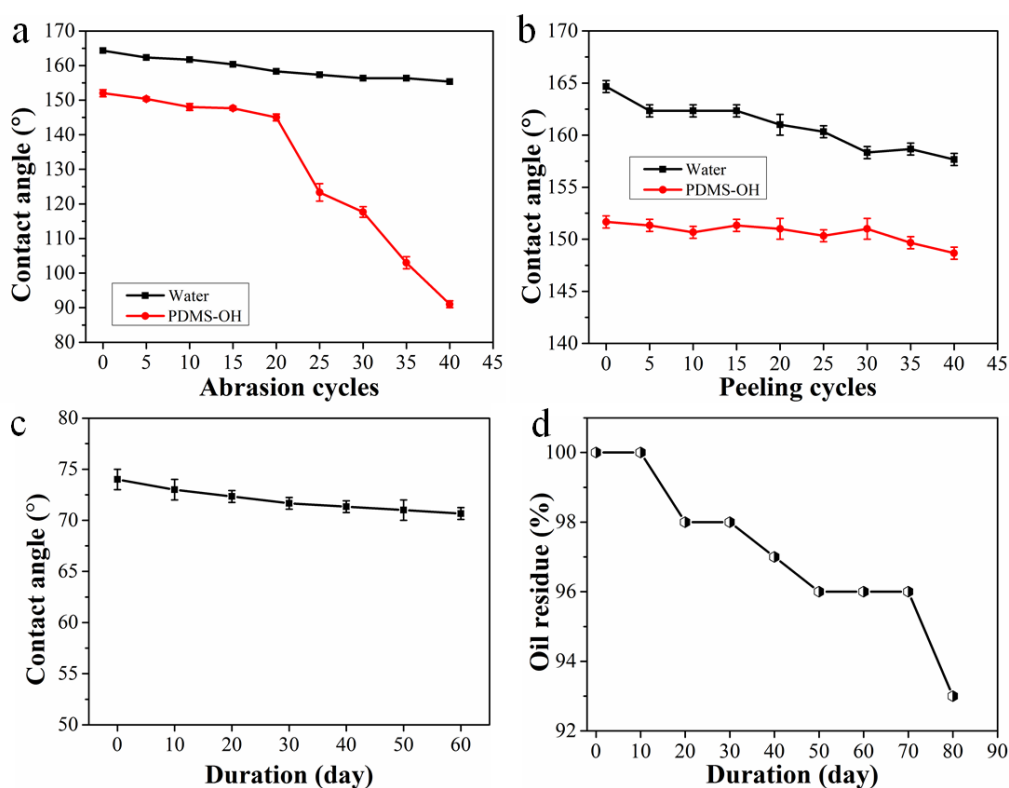

**Fig. S9.** (a) The relationship between CAs and SAs for water and hexadecane drops and abrasion cycles. (b) The relationship between CAs and SAs for water and hexadecane drops and peel cycles. (c) Changes in CAs and SAs according to the deposition duration in air for slippery surface. (d) Changes of oil residue according to deposition duration in air for slippery surface.

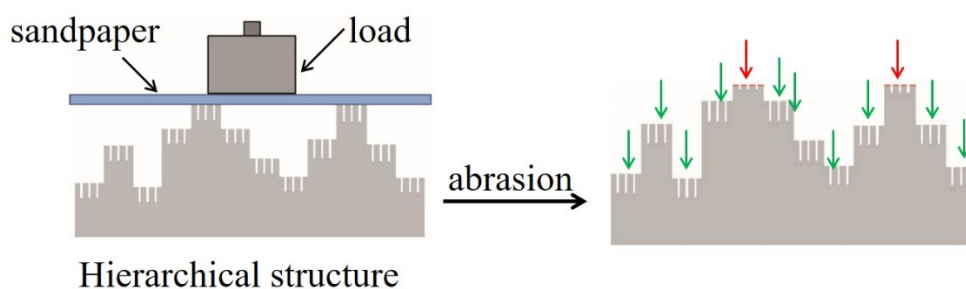

**Fig. S10.** Mechanism of abrasion resistance of the superamphiphobic and slippery surfaces with hierarchical structure.

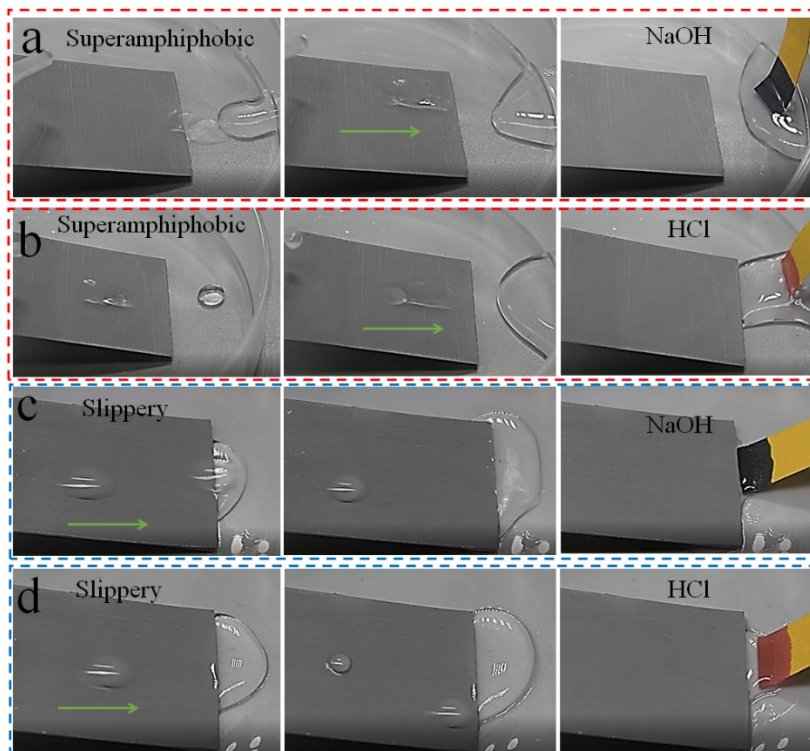

**Fig. S11.** Both superamphiphobic and slippery surfaces quickly repel 1M NaOH and 1M HCl drops.
